# Supplementary material for: Electronic structure and mechanism for the uptake of nitric oxide by the Ru(iii) antitumor complex NAMI-A
Source: Royal Society of Chemistry journal article supplement (doi:10.1039/d0ra10622d), 2021-01-01
Supplement: d0ra10622d1.pdf [file d0ra10622d1.pdf]

## SUPPORTING INFORMATION

### **Electronic Structure and Mechanism for the Uptake of Nitric Oxide by the Ru(III) Antitumor complex NAMI-A**

*Eufrásia S. Pereira<sup>a</sup>, Gabriel L. S. Rodrigues<sup>a,b,\*</sup>, Willian R. Rocha<sup>a,\*</sup>*

<sup>a</sup>*Laboratório de Estudos Computacionais em Sistemas Moleculares, eCsMo<sup>lab</sup>*  
Departamento de Química, ICEx, Universidade Federal de Minas Gerais  
31270-901, Pampulha, Belo Horizonte, MG, Brazil

<sup>b</sup>Present Address: Department of Physics, Albanova University Center,  
Stockholm University, 10691 Stockholm, Sweden

---

\* Corresponding authors. *E-mail addresses:* [gabriellibanio@ufmg.br](mailto:gabriellibanio@ufmg.br) (G. L. S. Rodrigues) ;  
[wrocha@ufmg.br](mailto:wrocha@ufmg.br) (W. R. Rocha).

## Contents

|                                     |     |
|-------------------------------------|-----|
| Tables.....                         | S3  |
| Figures .....                       | S6  |
| ORCA Input Examples .....           | S10 |
| XYZ Structures (all gas phase)..... | S11 |

## Tables

|                                                                                                                                                                                                      |    |
|------------------------------------------------------------------------------------------------------------------------------------------------------------------------------------------------------|----|
| Table S1: Energy Values obtained for the <b>NAMI-H<sub>2</sub>O</b> + NO Reaction.....                                                                                                               | S3 |
| Table S2: Energy values obtained for the Minimum Energy Crossing Points located between the singlet and triplet potential energy surfaces for the <b>NAMI-H<sub>2</sub>O</b> + NO Reaction .....     | S4 |
| Table S3: CASSCF active space details for the calculated molecules. ....                                                                                                                             | S4 |
| Table S4: SA-CASSCF(4,4)/NEVPT2 (1 root each state) electronic energies (Hartree) for each stationary point of singlet and triplet DFT reaction paths.....                                           | S4 |
| Table S5: Spin-orbit coupling (T <sub>1</sub> -S <sub>1</sub> ) SA-CASSCF calculations with <i>n</i> electrons and <i>m</i> orbitals and increasing number of singlet (S) and triplet (T) roots..... | S5 |

## Figures

|                                                                                       |    |
|---------------------------------------------------------------------------------------|----|
| Figure S1: SA-CASSCF active orbitals for the reactants at the triplet PES.....        | S6 |
| Figure S2: SA-CASSCF active orbitals for the transition state at the triplet PES..... | S7 |
| Figure S3: SA-CASSCF active orbitals for the MECF3.....                               | S8 |
| Figure S4: CASSCF active orbitals for the products at the singlet PES. ....           | S9 |

## Tables

**Table S 1:** Energy Values obtained for the **NAMI-H<sub>2</sub>O** + NO Reaction (Energy values in a.u and bond length in Å). Gibbs free energy difference ( $\Delta G$ ) are given relative to the most stable (triplet) reactant.\*

| Parameter                        | Singlet Surface |                |                |
|----------------------------------|-----------------|----------------|----------------|
|                                  | Reactant        | TS             | Product        |
| $E_h$                            | -2461.19471284  | -2461.18927691 | -2461.25607305 |
| ZPE                              | 0.19175919      | 0.19127118     | 0.19255212     |
| $G_{el}$                         | 0.14342381      | 0.14440313     | 0.14415090     |
| $G(E_h + G_{el})$                | -2461.0512890   | -2461.0448708  | -2461.1119222  |
| $G_{total}(G_{gas} + G_{solv})$  | -2461.0838676   | -2461.0720207  | -2461.1470149  |
| $\Delta G_g$ (kcal/mol)          | 15.67           | 19.70          | -22.38         |
| $\Delta G_{solution}$ (kcal/mol) | 14.18           | 21.62          | -25.44         |
| r (Ru-NO)                        | 3.721           | 2.216          | 1.746          |

  

| Parameter                        | Triplet Surface |                |                |
|----------------------------------|-----------------|----------------|----------------|
|                                  | Reactant        | TS             | Product        |
| $E_h$                            | -2461.21623210  | -2461.19159159 | -2461.21131986 |
| ZPE                              | 0.19028267      | 0.18858941     | 0.18978040     |
| $G_{el}$                         | 0.13996716      | 0.13731995     | 0.14008567     |
| $G_{gas}(E_h + G_{el})$          | -2461.0762649   | -2461.0542716  | -2461.0712342  |
| $G_{total}(G_{gas} + G_{solv})$  | -2461.1064709   | -2461.0834231  | -2461.1081457  |
| $\Delta G_g$ (kcal/mol)          | 0.00            | 13.80          | 3.16           |
| $\Delta G_{solution}$ (kcal/mol) | 0.00            | 14.46          | -1.05          |
| r (Ru-NO)                        | 4.801           | 3.675          | 1.912          |

\*  $E_h$  is the total electronic energy in gas phase; ZPE is the Zero Point Energy correction;  $G_{el}$  is the thermal correction to the Gibbs free energy;  $G_{gas}$  is the Gibbs free energy in gas phase.  $G_{total}$  is the total Gibbs free energy of the species including the free energy of solvation.  $\Delta G_g$  is the variation of the Gibbs free energy in gas phase and  $\Delta G_{solution}$  is the variation of the Gibbs free energy in solution.

**Table S2:** Energy values obtained for the Minimum Energy Crossing Points located between the singlet and triplet potential energy surfaces for the **NAMI-H<sub>2</sub>O** + NO Reaction (Energy values in a.u and bond length in Å).\*

| Parameter          | MECP1*         | MECP2**        | MECP3          |
|--------------------|----------------|----------------|----------------|
| $E_h$              | -2461.16705241 | -2461.22313327 | -2461.21211064 |
| ZPE                | 0.18816361     | 0.19031238     | 0.18913759     |
| $G_{el}$           | 0.14034759     | 0.14231518     | 0.14077524     |
| $G (E_h + G_{el})$ | -2461.0267048  | -2461.0808181  | -2461.0713354  |
| $\Delta G_{gas}$   | 31.10          | 15.97          | 3.10           |
| $r$ (Ru-NO)        | 3.311          | 1.853          | 1.974          |

\*  $E_h$  is the total electronic energy in gas phase; ZPE is the Zero Point Energy correction;  $G_{el}$  is the thermal correction to the Gibbs free energy;  $G_{gas}$  is the Gibbs free energy in gas phase.  $\Delta G_g$  is the variation of the Gibbs free energy in gas phase relative to the most stable (triplet) reactant.

**Table S3:** Details of the CASSCF active space for the calculated molecules.

| Molecule                | Multiplicity | $n_{elec}$ | $n_{orb}$ | $N^{FOD}$ (a.u.) |
|-------------------------|--------------|------------|-----------|------------------|
| NAMI-A                  | 2            | 5          | 5         | 1.15             |
| NAMI-A-H <sub>2</sub> O | 2            | 5          | 5         | 1.13             |
| NAMI-A-NO-s             | 1            | 8          | 8         | 0.52             |
| NAMI-A-NO-t             | 3            | 6          | 6         | 1.56             |

$n_{elec}$  = number of electrons

$n_{orb}$  = number of orbitals

$N^{FOD}$  = amount of static correlation given by the FOD calculation. The larger the number the higher the system is correlated.

**Table S4:** SA-CASSCF(4,4)/NEVPT2 (1 root each state) electronic energies (Hartree) for each stationary point of singlet and triplet DFT reaction paths.\*

| Path    | Reactants    |                     | TS                  |                     | Products            |              |
|---------|--------------|---------------------|---------------------|---------------------|---------------------|--------------|
|         | CASSCF       | SA-CASSCF           | CASSCF              | SA-CASSCF           | CASSCF              | SA-CASSCF    |
| singlet | -7044.776303 | -7045.425769        | -7045.564376        | -7045.465138        | <b>-7045.634316</b> | -7045.582499 |
| triplet | -7045.572162 | <b>-7045.586165</b> | <b>-7045.573647</b> | <b>-7045.573606</b> | -7045.560354        | **           |

\* The numbers in bold shows the structure with lower energy in each one of the stationary points (reactants, TS and products).

\*\*The triplet geometry of the products could not be converged with the SA-CASSCF wavefunction.

**Table S5:** SA-CASSCF spin-orbit coupling, SOC, ( $T_1$ - $S_1$ ) calculations, at the MECF geometry, with  $n$  electrons and  $m$  orbitals and increasing number of singlet (S) and triplet (T) roots.

| $N_{roots}$ (T,S) | Active Space (n,m) | SOC (cm <sup>-1</sup> ) |
|-------------------|--------------------|-------------------------|
|-------------------|--------------------|-------------------------|

---

|       |       |       |
|-------|-------|-------|
| 1,1   | (4,4) | 60.80 |
| 2,2   | (4,4) | 56.57 |
| 4,4   | (4,4) | 65.25 |
| 6,6   | (4,4) | 403.9 |
| 8,8   | (4,4) | 510.2 |
| 10,10 | (4,4) | 476.4 |
| 6,10  | (2,4) | 251.7 |
| 10,10 | (6,8) | 442.2 |
| 10,10 | (8,8) | 450.7 |

---

## Figures

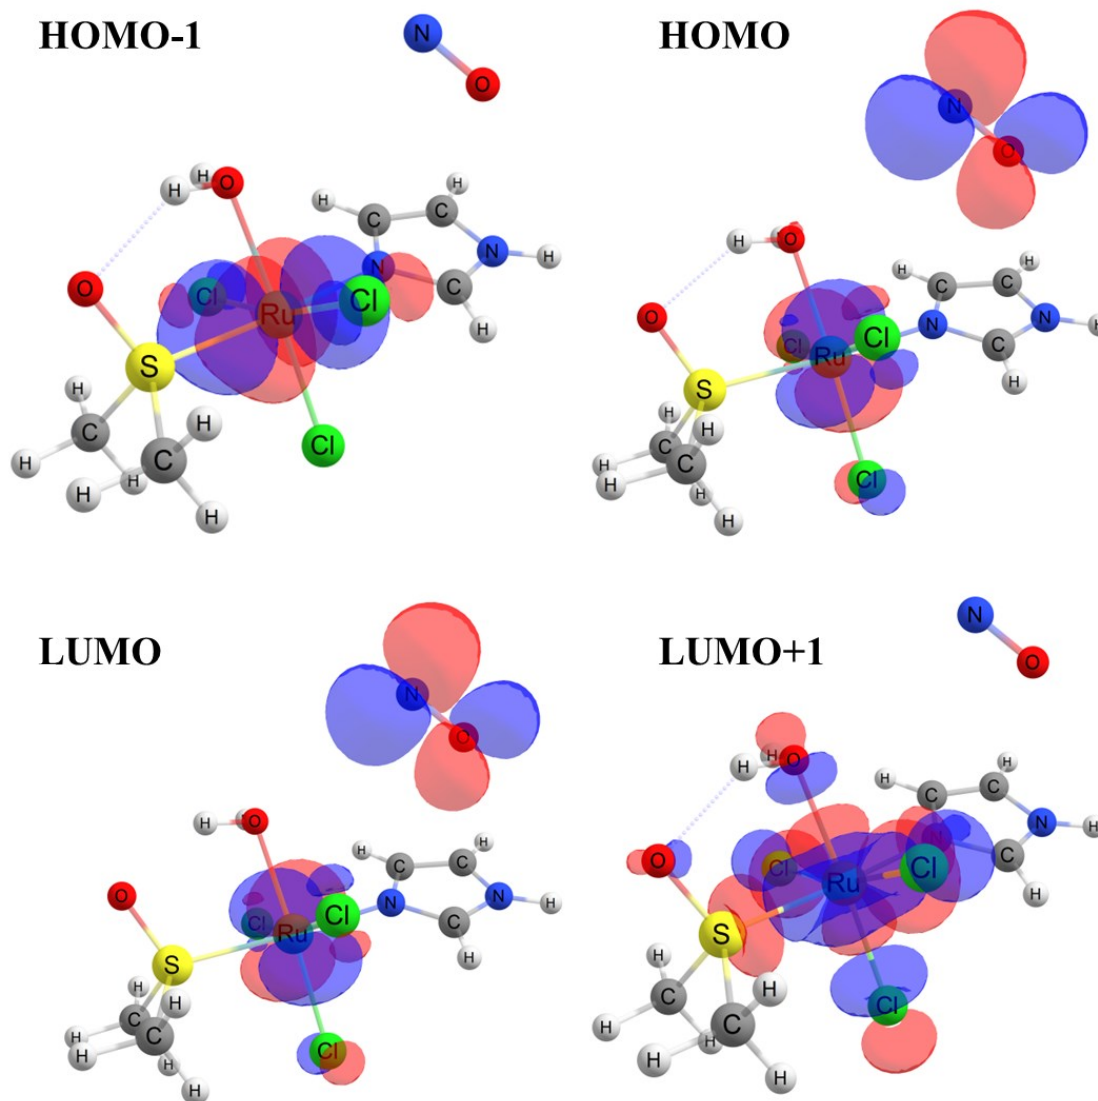

**Figure S1:** SA-CASSCF active orbitals for the reactants at the triplet PES. OBS: Although illustrated in the picture as HOMO and LUMO, both orbitals are SOMO orbitals with occupation of 1.0. Orbital occupations: HOMO-1 (2.0), HOMO (1.0), LUMO (1.0), LUMO+1 (0.0)

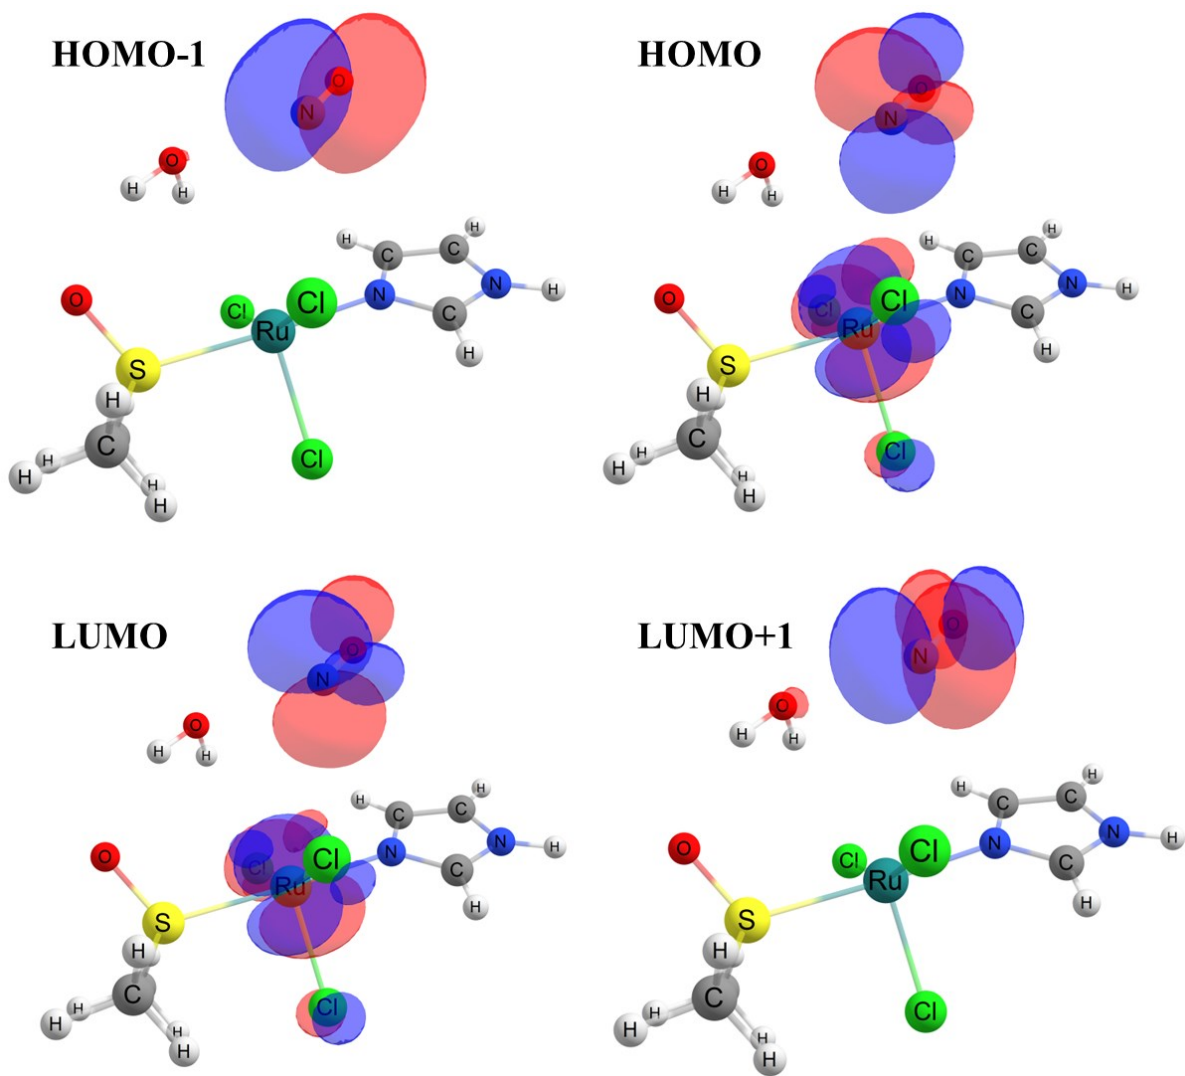

**Figure S2:** SA-CASSCF active orbitals for the transition state at the triplet PES. OBS: Although illustrated in the picture as HOMO and LUMO, both orbitals are SOMO orbitals with occupation of 1.0. Orbital occupations: HOMO-1 (1.9), HOMO (1.0), LUMO (1.0), LUMO+1 (0.1)

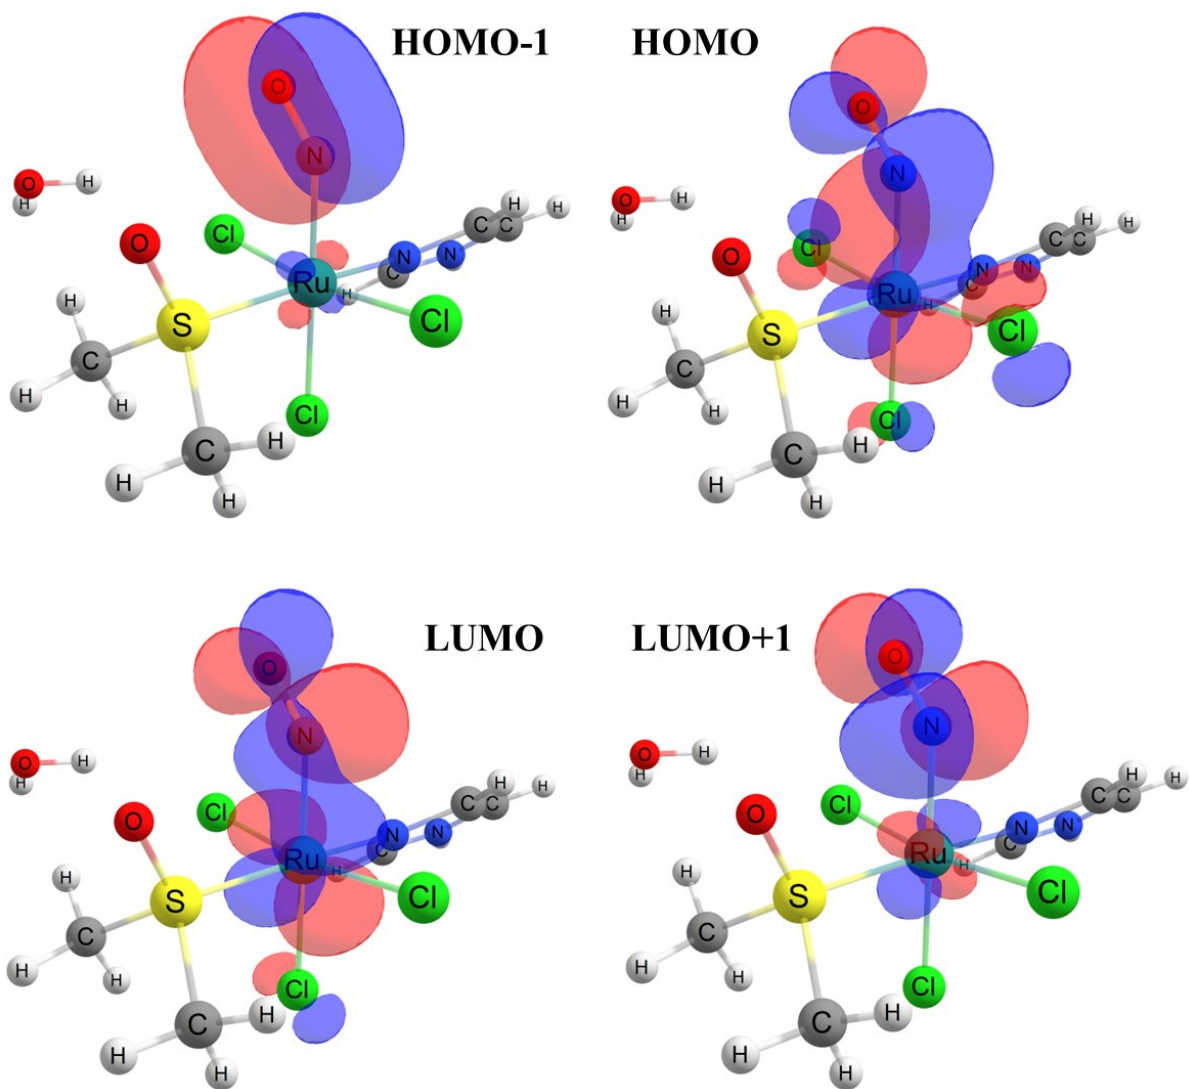

**Figure S3:** SA-CASSCF active orbitals for the MECP3. **OBS:** HOMO and LUMO orbitals at this point are partially SOMO orbitals in which the NO charge transfer partially happened. **Orbital occupations:** HOMO-1 (1.9), HOMO (1.2), LUMO (0.8), LUMO+1 (0.1)



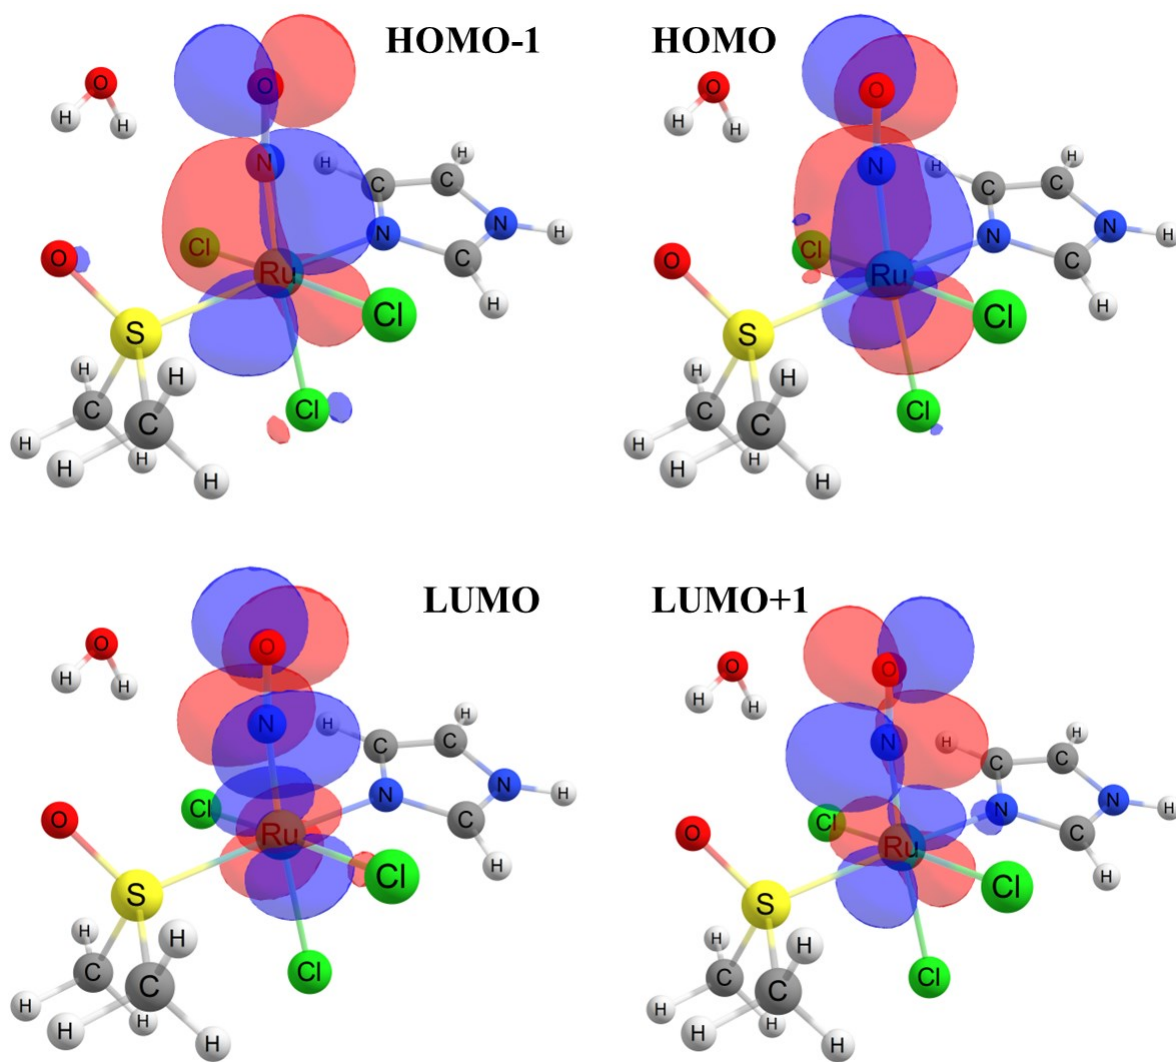

**Figure S4:** CASSCF active orbitals for the products at the singlet PES. **Orbital occupations:** HOMO-1 (1.8), HOMO (1.8), LUMO (0.2), LUMO+1 (0.2)

## ORCA Input Examples

### SA-CASSCF(4,4) – 10 triplet, 10 singlet roots

```
! old-DKH-TZVP SARC/J RIJCOSX GRIDX6
! DKH NEVPT2 def2-TZVP/C
#--- CASSCF Active Space Parameters
%casscf
  NEI 4
  NOrb 4
  Mult 3,1
  NRoots 10,10
  NEVPT2 SC
  #---- CAS Relativistic ----
  rel
    DoSOC True
  end
  #---- CAS Convergence ----
  MaxIter 800
  #---- Post Analysis ----
  PrintWF det
  CI TPrintWF 0.1 end
end
#--- Read Pre MO Calculation (CAS 4,4 with 1 root each)
! moread
%moinp "namia-no.mecp3.sacas44.nr1.gbw"
#--- Print Orbitals
%output
  Print[ P_Basis ] 2
  Print[ P_MOs ] 1
end
```

### MECP optimization

```
! RKS B3LYP def2-TZVP GRID5
! RIJCOSX def2/J GRIDX6
! Freq
! SurfCrossOpt SurfCrossNumFreq
%scf
  MaxIter 350
  LShift 1.0
  ShiftErr 0.05
end
%geom
  MaxIter 250
end
%mecp
  Mult 3
end
```

## XYZ Structures (all gas phase)

### NAMIA-A-H<sub>2</sub>O optimized

|    |              |              |              |
|----|--------------|--------------|--------------|
| Ru | 1.190622000  | 1.062794000  | -0.047438000 |
| Cl | 3.261206000  | 1.979984000  | 0.307235000  |
| Cl | 1.236639000  | 1.067451000  | -2.443532000 |
| Cl | 0.447299000  | 0.853213000  | 2.179723000  |
| N  | 0.364065000  | 3.041512000  | -0.111654000 |
| C  | 0.716460000  | 3.959519000  | -0.991331000 |
| H  | 1.396398000  | 3.808683000  | -1.810858000 |
| C  | -0.515561000 | 3.641439000  | 0.766134000  |
| H  | 0.210019000  | 5.979709000  | -1.231518000 |
| C  | -0.696000000 | 4.939827000  | 0.397539000  |
| H  | -1.287802000 | 5.728264000  | 0.825820000  |
| N  | 0.094064000  | 5.123745000  | -0.716566000 |
| H  | -0.909929000 | 3.107639000  | 1.611601000  |
| S  | 2.130650000  | -1.055271000 | 0.040059000  |
| O  | 2.538887000  | -1.628708000 | 1.327144000  |
| C  | 3.543826000  | -1.151066000 | -1.069300000 |
| H  | 3.247132000  | -0.822942000 | -2.063331000 |
| H  | 3.896615000  | -2.181613000 | -1.057578000 |
| H  | 1.521248000  | -3.199187000 | -0.769576000 |
| C  | 1.015016000  | -2.234928000 | -0.747372000 |
| H  | 0.753309000  | -1.886830000 | -1.744775000 |
| H  | 0.129426000  | -2.286980000 | -0.118801000 |
| H  | 4.291751000  | -0.478713000 | -0.655934000 |
| O  | -0.866125000 | 0.270177000  | -0.444254000 |
| H  | -1.227394000 | 0.777817000  | -1.184269000 |
| H  | -1.359656000 | 0.484679000  | 0.362855000  |

### NAMIA-A-NO singlet reactants optimized

|    |              |              |              |
|----|--------------|--------------|--------------|
| N  | 2.423879000  | 2.416057000  | 2.532241000  |
| O  | 2.505880000  | 3.172627000  | 1.719160000  |
| Ru | 0.491401000  | 0.985177000  | -0.307980000 |
| Cl | 2.733346000  | 1.724171000  | -0.791372000 |
| Cl | -0.175982000 | 0.962873000  | -2.621760000 |
| Cl | 0.721236000  | 1.008880000  | 2.076358000  |
| S  | 1.120726000  | -1.173235000 | -0.416973000 |
| O  | 0.008215000  | -2.135269000 | -0.165977000 |
| C  | 2.452052000  | -1.605106000 | 0.715388000  |
| H  | 3.284923000  | -0.926876000 | 0.536526000  |
| H  | 2.730478000  | -2.644352000 | 0.545072000  |
| H  | 2.205859000  | -2.668367000 | -1.919216000 |

|   |              |              |              |
|---|--------------|--------------|--------------|
| C | 1.893919000  | -1.626085000 | -1.975595000 |
| H | 2.732048000  | -0.951879000 | -2.143828000 |
| H | 1.140535000  | -1.475172000 | -2.743981000 |
| H | 2.059203000  | -1.469775000 | 1.719983000  |
| N | -0.208572000 | 2.996264000  | -0.244237000 |
| C | 0.171345000  | 3.927295000  | -1.096211000 |
| H | 0.872608000  | 3.783678000  | -1.898964000 |
| C | -1.110569000 | 3.580275000  | 0.618559000  |
| H | -0.324277000 | 5.953766000  | -1.315187000 |
| C | -1.270031000 | 4.890582000  | 0.277265000  |
| H | -1.877226000 | 5.672574000  | 0.695854000  |
| N | -0.445787000 | 5.093141000  | -0.809713000 |
| H | -1.573010000 | 3.019039000  | 1.410594000  |
| O | -1.569507000 | 0.252719000  | -0.060150000 |
| H | -1.426129000 | -0.709300000 | 0.058030000  |
| H | -1.854133000 | 0.352596000  | -0.987645000 |

#### NAMIA-A-NO singlet products optimized

|    |              |              |              |
|----|--------------|--------------|--------------|
| N  | 0.014679000  | 1.159926000  | 1.390579000  |
| O  | -0.311230000 | 1.172850000  | 2.474967000  |
| Ru | 0.744128000  | 1.275882000  | -0.191944000 |
| Cl | 1.953334000  | 1.545181000  | -2.199566000 |
| Cl | -1.246221000 | 0.699326000  | -1.441921000 |
| Cl | 2.788253000  | 1.880081000  | 0.978332000  |
| S  | 1.299134000  | -1.059808000 | -0.202711000 |
| O  | 0.464901000  | -1.901682000 | 0.677023000  |
| C  | 3.027606000  | -1.327435000 | 0.203590000  |
| H  | 3.637331000  | -0.687995000 | -0.431310000 |
| H  | 3.241380000  | -2.384953000 | 0.050003000  |
| H  | 1.584209000  | -2.768666000 | -1.798595000 |
| C  | 1.250412000  | -1.733308000 | -1.863545000 |
| H  | 1.890588000  | -1.131578000 | -2.503731000 |
| H  | 0.217680000  | -1.663422000 | -2.196179000 |
| H  | 3.159999000  | -1.040835000 | 1.243689000  |
| N  | 0.237793000  | 3.322008000  | -0.334869000 |
| C  | 1.100429000  | 4.320571000  | -0.319675000 |
| H  | 2.165834000  | 4.216404000  | -0.214991000 |
| C  | -1.024203000 | 3.860291000  | -0.470803000 |
| H  | 0.864535000  | 6.394659000  | -0.452065000 |
| C  | -0.912409000 | 5.214409000  | -0.530812000 |
| H  | -1.651666000 | 5.987061000  | -0.637573000 |
| N  | 0.436648000  | 5.484467000  | -0.438201000 |
| H  | -1.894951000 | 3.234665000  | -0.543345000 |
| O  | -2.373882000 | -0.685363000 | 1.420116000  |
| H  | -1.683674000 | -1.361261000 | 1.375857000  |

|   |              |              |             |
|---|--------------|--------------|-------------|
| H | -2.410468000 | -0.344093000 | 0.514264000 |
|---|--------------|--------------|-------------|

**NAMIA-A-NO singlet TS optimized**

|    |              |              |              |
|----|--------------|--------------|--------------|
| N  | 0.172039000  | 1.376219000  | 1.982625000  |
| O  | -0.322713000 | 2.298860000  | 2.416387000  |
| Ru | 0.640992000  | 1.126085000  | -0.168521000 |
| Cl | 2.240282000  | 1.637442000  | -1.784861000 |
| Cl | -1.049044000 | 0.767053000  | -1.788379000 |
| Cl | 2.465704000  | 1.591865000  | 1.466996000  |
| S  | 1.255266000  | -1.120150000 | -0.212451000 |
| O  | 0.460269000  | -2.025813000 | 0.660732000  |
| C  | 2.997510000  | -1.403756000 | 0.124090000  |
| H  | 3.575699000  | -0.738690000 | -0.515379000 |
| H  | 3.209674000  | -2.452242000 | -0.082736000 |
| H  | 1.541274000  | -2.794257000 | -1.868738000 |
| C  | 1.177925000  | -1.767285000 | -1.888650000 |
| H  | 1.781583000  | -1.131577000 | -2.533241000 |
| H  | 0.136266000  | -1.717991000 | -2.194858000 |
| H  | 3.172295000  | -1.159853000 | 1.167846000  |
| N  | 0.108040000  | 3.180793000  | -0.259119000 |
| C  | 0.988640000  | 4.161886000  | -0.317118000 |
| H  | 2.056291000  | 4.042608000  | -0.275985000 |
| C  | -1.142433000 | 3.750260000  | -0.367774000 |
| H  | 0.799404000  | 6.236254000  | -0.539886000 |
| C  | -1.006007000 | 5.098744000  | -0.488614000 |
| H  | -1.730817000 | 5.884166000  | -0.601316000 |
| N  | 0.350795000  | 5.340205000  | -0.456954000 |
| H  | -2.034840000 | 3.152169000  | -0.376071000 |
| O  | -1.616947000 | -0.166245000 | 1.082776000  |
| H  | -1.096345000 | -0.991447000 | 1.114198000  |
| H  | -1.981595000 | -0.128429000 | 0.185381000  |

**NAMIA-A-NO triplet reactants optimized**

|    |              |              |              |
|----|--------------|--------------|--------------|
| N  | -1.004991000 | 2.857048000  | 3.587140000  |
| O  | -0.196318000 | 3.609612000  | 3.285543000  |
| Ru | 0.732540000  | 0.978531000  | -0.476267000 |
| Cl | 2.345395000  | 1.578888000  | -2.015714000 |
| Cl | -0.980858000 | 0.564896000  | -2.083743000 |
| Cl | 2.044193000  | 1.336171000  | 1.447874000  |
| S  | 1.336457000  | -1.233932000 | -0.500590000 |
| O  | 0.476547000  | -2.060435000 | 0.394070000  |
| C  | 3.058827000  | -1.523979000 | -0.079559000 |
| H  | 3.671425000  | -0.924928000 | -0.751781000 |
| H  | 3.262287000  | -2.588736000 | -0.187384000 |

|   |              |              |              |
|---|--------------|--------------|--------------|
| H | 1.666623000  | -2.988958000 | -2.065470000 |
| C | 1.301645000  | -1.965041000 | -2.137663000 |
| H | 1.923556000  | -1.356550000 | -2.792371000 |
| H | 0.268189000  | -1.930597000 | -2.472254000 |
| H | 3.196545000  | -1.187605000 | 0.944697000  |
| N | 0.098387000  | 3.000976000  | -0.386876000 |
| C | 0.900933000  | 4.011890000  | -0.122674000 |
| H | 1.948187000  | 3.931137000  | 0.106468000  |
| C | -1.155096000 | 3.526221000  | -0.615798000 |
| H | 0.596969000  | 6.081872000  | -0.002856000 |
| C | -1.100173000 | 4.879109000  | -0.478352000 |
| H | -1.853061000 | 5.639625000  | -0.577909000 |
| N | 0.210402000  | 5.168713000  | -0.169058000 |
| H | -1.986123000 | 2.903348000  | -0.889487000 |
| O | -0.861674000 | 0.333779000  | 0.922010000  |
| H | -0.599449000 | -0.593744000 | 1.111419000  |
| H | -1.623866000 | 0.262119000  | 0.323836000  |

#### NAMIA-A-NO triplet products optimized

|    |              |              |              |
|----|--------------|--------------|--------------|
| N  | 0.122448000  | 2.191269000  | 1.455057000  |
| O  | -0.464607000 | 1.866625000  | 2.395256000  |
| Ru | 0.902029000  | 1.473487000  | -0.136950000 |
| Cl | 1.832776000  | 0.526704000  | -2.172088000 |
| Cl | -1.260954000 | 0.920101000  | -0.899807000 |
| Cl | 3.056612000  | 2.030821000  | 0.574150000  |
| S  | 1.163582000  | -0.734326000 | 0.848442000  |
| O  | 0.773870000  | -0.874394000 | 2.259994000  |
| C  | 2.864708000  | -1.279237000 | 0.640578000  |
| H  | 3.123475000  | -1.202567000 | -0.413965000 |
| H  | 2.917870000  | -2.302215000 | 1.012387000  |
| H  | 0.659394000  | -2.942577000 | 0.195156000  |
| C  | 0.299184000  | -1.967549000 | -0.132639000 |
| H  | 0.511161000  | -1.784587000 | -1.184354000 |
| H  | -0.762369000 | -1.858800000 | 0.088059000  |
| H  | 3.486468000  | -0.612621000 | 1.230184000  |
| N  | 0.723838000  | 3.376113000  | -1.057023000 |
| C  | 0.676314000  | 3.583788000  | -2.359428000 |
| H  | 0.715633000  | 2.812552000  | -3.109684000 |
| C  | 0.665646000  | 4.605635000  | -0.438559000 |
| H  | 0.537937000  | 5.323219000  | -3.512845000 |
| C  | 0.585291000  | 5.571746000  | -1.391810000 |
| H  | 0.528781000  | 6.642451000  | -1.316819000 |
| N  | 0.590545000  | 4.904315000  | -2.599481000 |
| H  | 0.701001000  | 4.704699000  | 0.630935000  |
| O  | -2.880225000 | -1.388403000 | 0.828597000  |

|   |              |              |             |
|---|--------------|--------------|-------------|
| H | -2.679758000 | -0.529754000 | 0.429696000 |
| H | -2.755302000 | -1.265026000 | 1.776039000 |

**NAMIA-A-NO triplet TS optimized**

|    |              |              |              |
|----|--------------|--------------|--------------|
| N  | -0.711638000 | 2.051040000  | 2.738619000  |
| O  | -1.590985000 | 2.771304000  | 2.875294000  |
| Ru | 0.858845000  | 1.116458000  | -0.449975000 |
| Cl | 2.348896000  | 1.492391000  | -2.124861000 |
| Cl | -1.130535000 | 0.619924000  | -1.605777000 |
| Cl | 2.320423000  | 1.508161000  | 1.311953000  |
| S  | 1.364622000  | -1.134282000 | -0.424415000 |
| O  | 0.533157000  | -1.955839000 | 0.484181000  |
| C  | 3.096365000  | -1.461992000 | -0.062901000 |
| H  | 3.707616000  | -0.851753000 | -0.725756000 |
| H  | 3.277353000  | -2.525588000 | -0.213323000 |
| H  | 1.588214000  | -2.883657000 | -2.013243000 |
| C  | 1.265990000  | -1.844628000 | -2.072365000 |
| H  | 1.899914000  | -1.262326000 | -2.738284000 |
| H  | 0.226604000  | -1.767737000 | -2.381884000 |
| H  | 3.264952000  | -1.171589000 | 0.970616000  |
| N  | 0.294234000  | 3.161204000  | -0.429449000 |
| C  | 1.137468000  | 4.172646000  | -0.352963000 |
| H  | 2.205715000  | 4.087784000  | -0.265005000 |
| C  | -0.974120000 | 3.695391000  | -0.522672000 |
| H  | 0.872793000  | 6.252656000  | -0.351662000 |
| C  | -0.884915000 | 5.052311000  | -0.496932000 |
| H  | -1.637454000 | 5.818306000  | -0.543879000 |
| N  | 0.459676000  | 5.336817000  | -0.393048000 |
| H  | -1.841355000 | 3.068616000  | -0.614019000 |
| O  | -1.696395000 | -0.231879000 | 1.625002000  |
| H  | -1.028168000 | -0.926819000 | 1.514558000  |
| H  | -2.078065000 | -0.140050000 | 0.742567000  |

**MECP3 (B3LYP)**

|    |              |              |              |
|----|--------------|--------------|--------------|
| N  | -0.157477057 | 1.123116161  | 1.824442526  |
| O  | -1.189560699 | 0.759800224  | 2.166977125  |
| Ru | 0.913399932  | 1.385538882  | 0.186080292  |
| Cl | 2.210845457  | 1.650820323  | -1.741899061 |
| Cl | -1.071392787 | 0.948964541  | -1.042807750 |
| Cl | 2.672690824  | 1.917655958  | 1.668348092  |
| S  | 1.525105126  | -0.905769051 | 0.246061152  |
| O  | 1.022408150  | -1.665691063 | 1.400430910  |
| C  | 3.313946785  | -1.085037855 | 0.182478937  |

|   |              |              |              |
|---|--------------|--------------|--------------|
| H | 3.692636777  | -0.582177631 | -0.704634777 |
| H | 3.525043171  | -2.153731197 | 0.172368398  |
| H | 1.522863940  | -2.751233098 | -1.224328139 |
| C | 1.062062188  | -1.764726167 | -1.264278755 |
| H | 1.411910810  | -1.187027210 | -2.117871506 |
| H | -0.022946059 | -1.853945061 | -1.273304408 |
| H | 3.705159444  | -0.614443938 | 1.080456001  |
| N | 0.430572381  | 3.461875498  | 0.080787925  |
| C | -0.027066950 | 4.070094061  | -0.996065119 |
| H | -0.235104938 | 3.598059302  | -1.939102315 |
| C | 0.562787122  | 4.417371806  | 1.065385555  |
| H | -0.529939354 | 6.063121720  | -1.400355085 |
| C | 0.170320597  | 5.621250808  | 0.566175492  |
| H | 0.125464166  | 6.599171098  | 1.009902301  |
| N | -0.197295318 | 5.381277738  | -0.740065081 |
| H | 0.949264379  | 4.171904027  | 2.037654233  |
| O | -2.478679078 | -2.076125276 | -1.347397156 |
| H | -2.283584931 | -1.173188738 | -1.056257062 |
| H | -2.822481077 | -1.975502863 | -2.241337725 |
